# Supplementary material
Source: PubMed Central journal article supplement (PMC4333448)
Supplement: IAI.02685-14_zii999091101so1.pdf [file IAI.02685-14_zii999091101so1.pdf]

Fig. S1

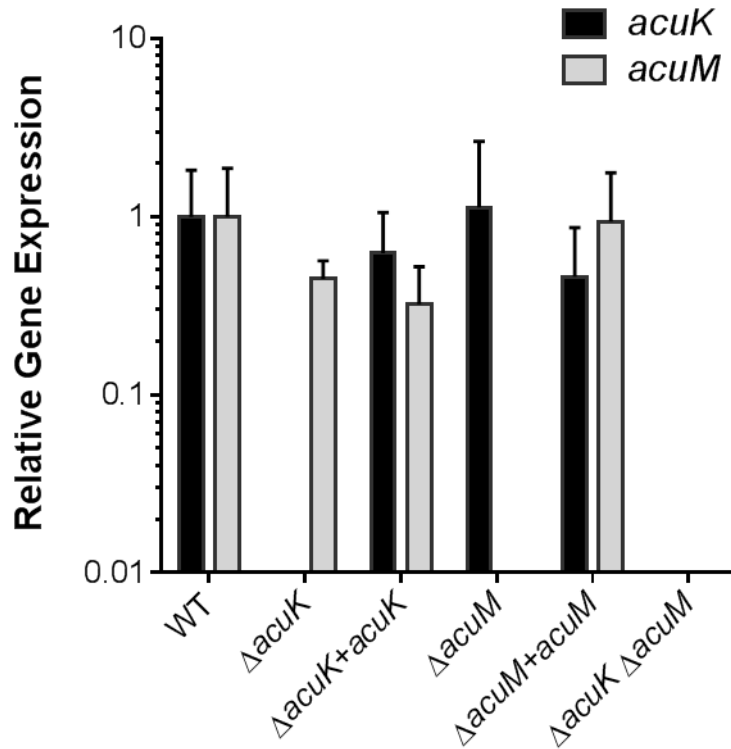

FIG S1 Relative *acuM* and *acuK* mRNA levels in mutants lacking *acuK* and/or *acuM*. The indicated *A. fumigatus* strains were grown in RPMI 1640 broth for 24 h, after which total RNA was isolated. The transcript abundance of *acuM* and *acuK* was measured using real-time RT-PCR and normalized to *TEF1* mRNA levels. Results are the mean  $\pm$  SD of 3 biological replicates, each tested in triplicate.

## WFL-FITC staining

Af293

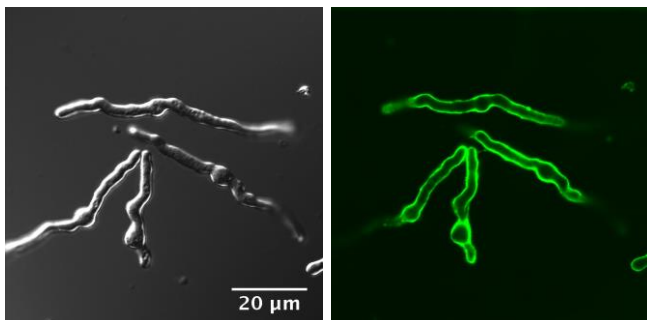 $\Delta uge3$ 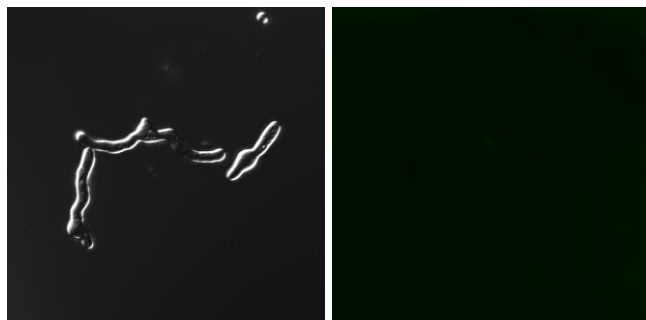 $\Delta acuK$ 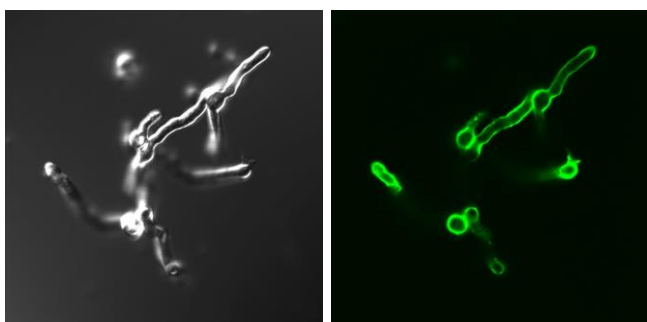 $\Delta acuM$ 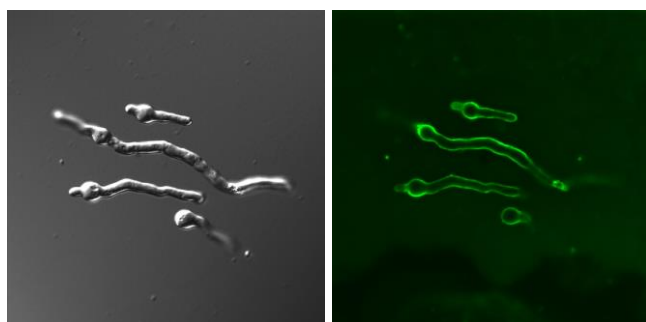 $\Delta acuM \Delta acuK$ 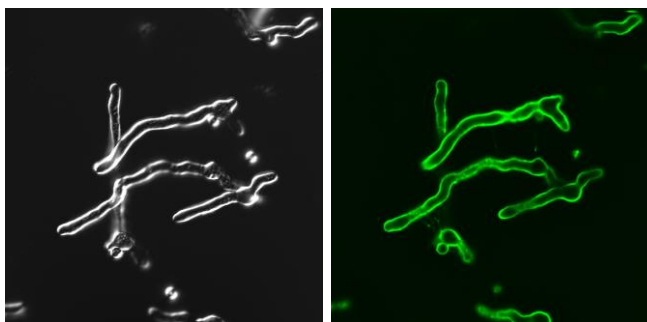

FIG S2 Deletion of *acuK* and *acuM* has no effect of the surface expression of galactosaminogalactan (GAG). The indicated strains were germinated for 9 h and then stained with FITC-labeled *Wisteria fluoribunda* lectin (WFL) to detect surface-exposed GAG. The strains were then imaged by differential interference contrast (left) and confocal microscopy (right). The GAG-deficient  $\Delta uge3$  strain was used as a negative control.

## DIC &amp; Aniline Blue staining

3D-rendered Z-stacks    Scale Bar = 20 $\mu$ m

Af293

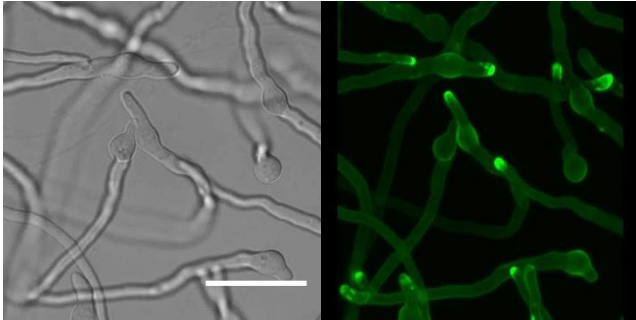 $\Delta$ *acuK*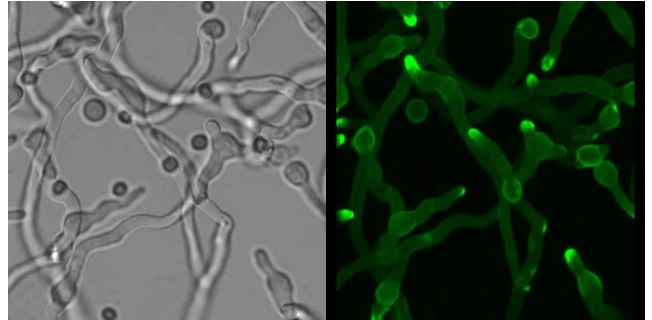 $\Delta$ *acuM*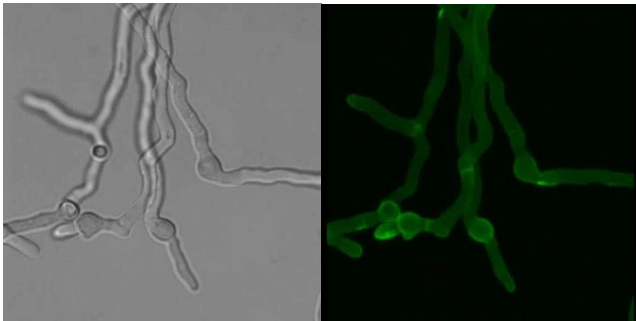 $\Delta$ *acuM*  $\Delta$ *acuK*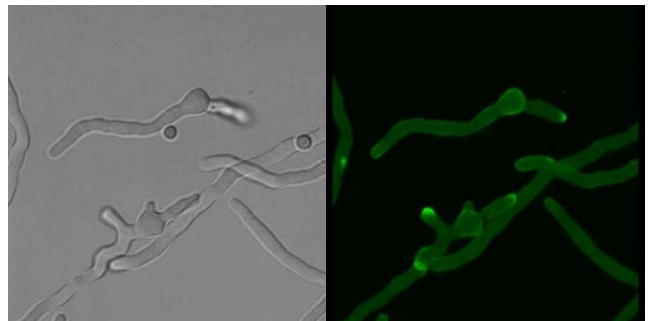

FIG S3 Deletion of *acuK* and *acuM* has no effect on cell wall  $\beta$ -glucan. The indicated strains were germinated for 9 h and then stained aniline blue to detect  $\beta$ -glucan. The strains were then imaged by differential interference contrast (left) and confocal microscopy (right).

Fig. S4

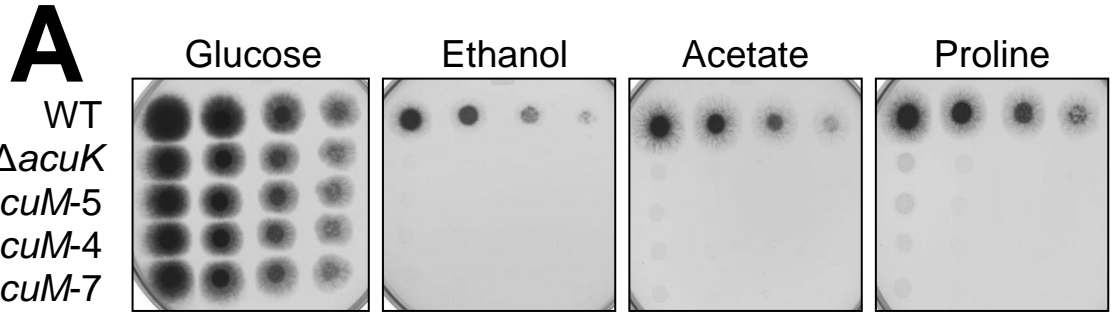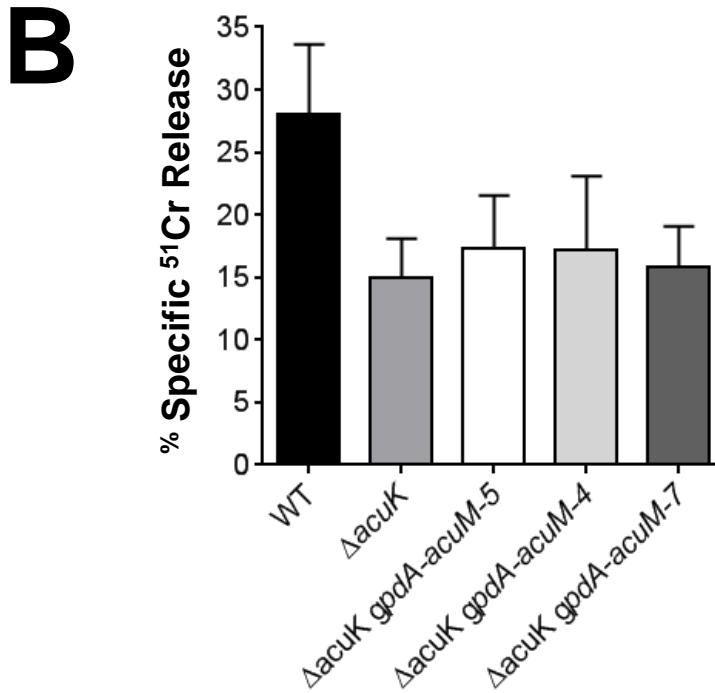

FIG S4 Effects of overexpression of *acuM* on the growth of the  $\Delta acuK$  mutant on gluconeogenic carbon sources (A) and damage to a pulmonary epithelial cell line. (A) Serial 10-fold dilution of the indicated strains were plated on agar containing glucose, ethanol, acetate, or proline as the carbon source. The plates were imaged after incubation at 37°C for 48 h. (B) The A549 pulmonary epithelial cell line was infected with the indicated strains of *A. fumigatus* for 20 h, after which the extent epithelial cell damage was assessed by a  $^{51}\text{Cr}$  release assay. Results are the mean  $\pm$  SD of 3 independent experiments, each performed in triplicate.
